# Supplementary material for: UV absorber co-intercalated layered double hydroxides as efficient hybrid UV-shielding materials for polypropylene
Source: Royal Society of Chemistry journal article supplement (doi:10.1039/c9dt00111e), 2019-01-01
Supplement: c9dt00111e1.pdf [file c9dt00111e1.pdf]

## Electronic Supplementary Information

### **UV absorber co-intercalated layered double hydroxides as efficient hybrid UV-shielding materials for polypropylene**

Ruoyu Ma, Pinggui Tang\*, Yongjun Feng, and Dianqing Li\*

\* State Key Laboratory of Chemical Resource Engineering, and Beijing Engineering Center for Hierarchical Catalysts, Beijing University of Chemical Technology, Beijing 100029, P.R. China.

Corresponding author: tangpg@mail.buct.edu.cn. (Pinggui Tang);

lidq@mail.buct.edu.cn. (Dianqing Li)

### **Preparation of NO<sub>3</sub>-LDH**

Mg(NO<sub>3</sub>)<sub>2</sub>·6H<sub>2</sub>O (20 mM), Zn(NO<sub>3</sub>)<sub>2</sub>·6H<sub>2</sub>O (10 mM) and Al(NO<sub>3</sub>)<sub>3</sub>·9H<sub>2</sub>O (10 mM) were dissolved in 50 mL of deionized water to form a salt solution. NaOH (76 mM) were dissolved in 50 mL of deionized water to form an alkaline solution. Subsequently, the salt solution and alkaline solution were synchronously dropped into a flask with vigorous stirring at room temperature under N<sub>2</sub> atmosphere within 10 min. The formed semident was crystallized at 95 °C for 6 h in a water-bath with vigorous stirring under a N<sub>2</sub> atmosphere. The obtained precipitate was centrifuged and washed for five cycles with deionized water and dried in oven at 90 °C for 12 h.

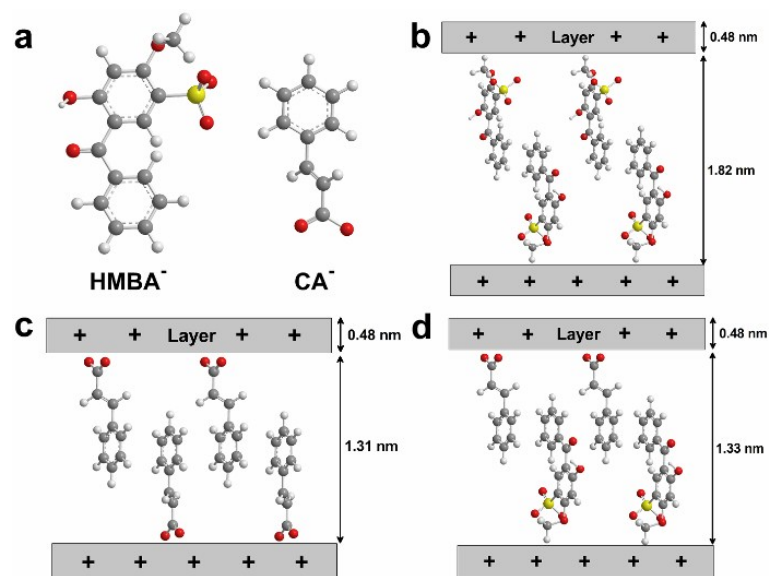

**Fig. S1.** Models of HMBA and CA (a), the possible arrangements of HMBA and/or CA in the interlayer of HMBA-LDH (b), CA-LDH (c), and HMBA-CA-LDH.

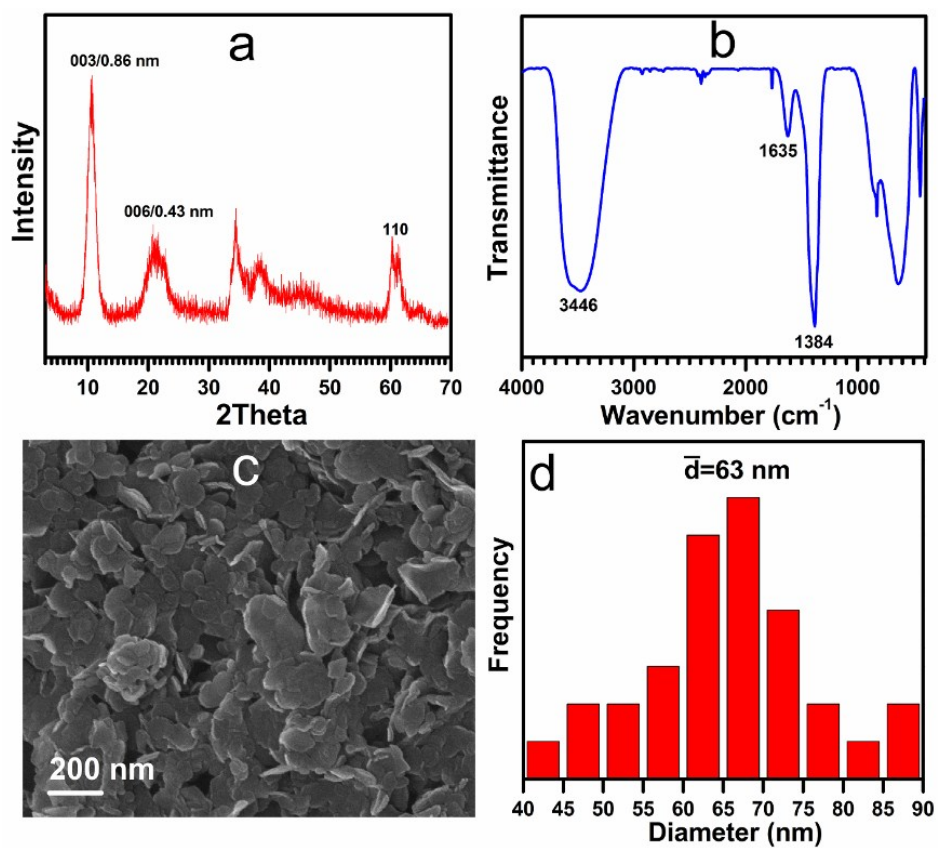

**Fig. S2.** XRD pattern (a), FT-IR spectrum (b), SEM image (c) and particle size statistic histogram (d) of NO<sub>3</sub>-LDH.

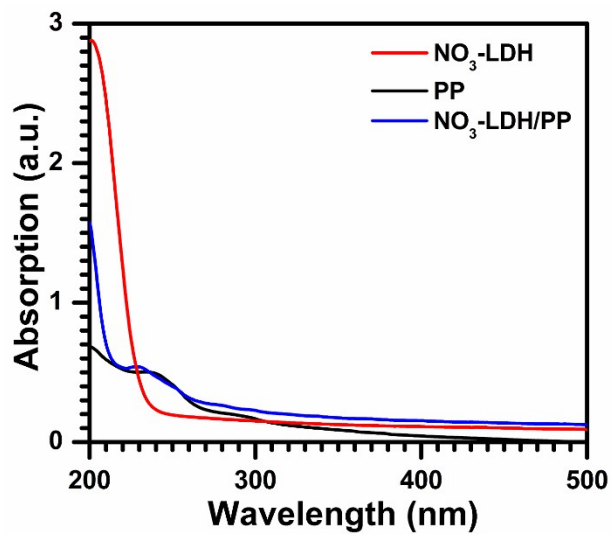

Fig. S3. UV-vis absorption spectra of NO<sub>3</sub>-LDH, PP and NO<sub>3</sub>-LDH/PP

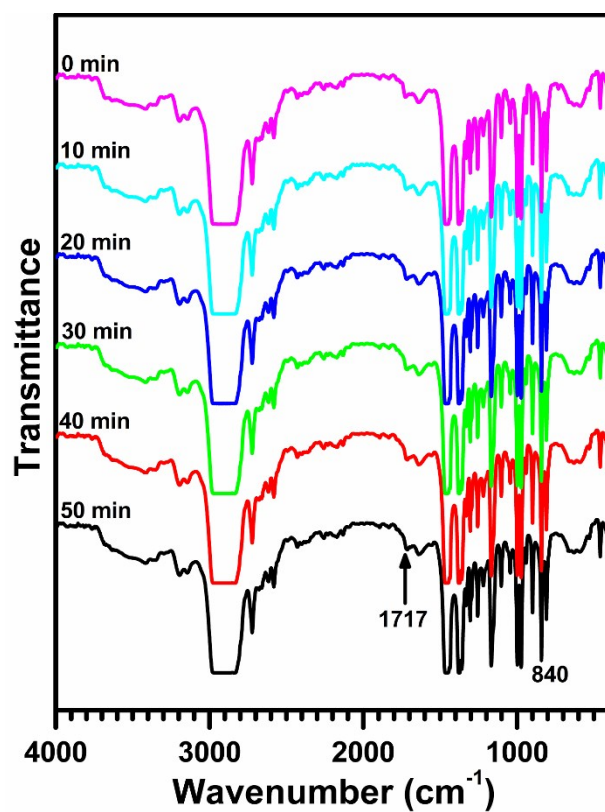

Fig. S4. FT-IR spectra of NO<sub>3</sub>-LDH/PP before and after photoaging with different time.

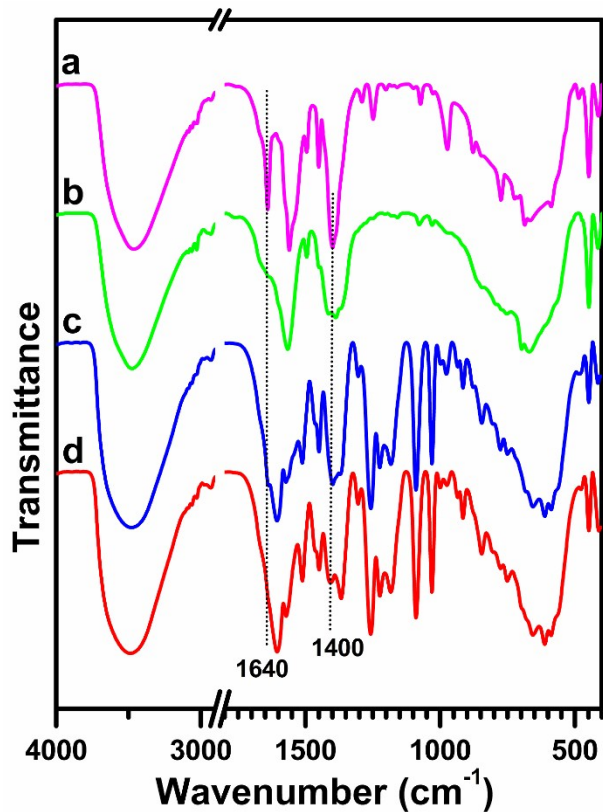

**Fig. S5.** FT-IR spectra of CA-LDH before (a) and after (b) 50 min UV irradiation, HMBA-CA-LDH before (c) and after (d) 50 min UV irradiation.

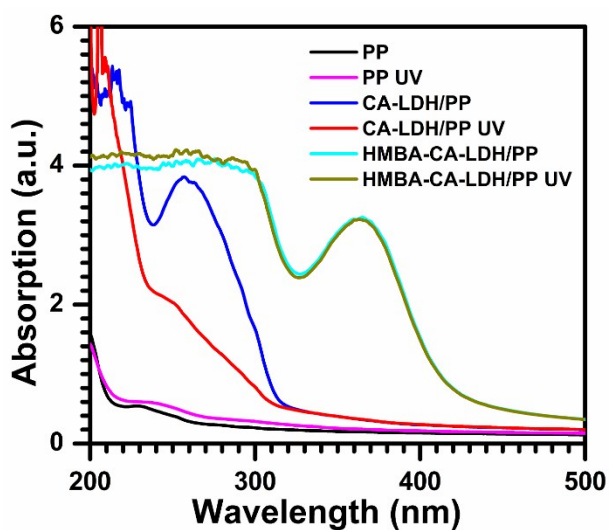

**Fig. S6.** UV-vis absorption spectra of PP, CA-LDH/PP and HMBA-CA-LDH/PP before and after 50 min UV irradiation
